# Supplementary material for: Ciabatta Bread Incorporating Goji (Lycium barbarum L.): A New Potential Functional Product with Impact on Human Health
Source: MDPI journal article supplement (doi:10.3390/foods12030566), 2023-01-27
Supplement: s1 [file s1]

## Baking process

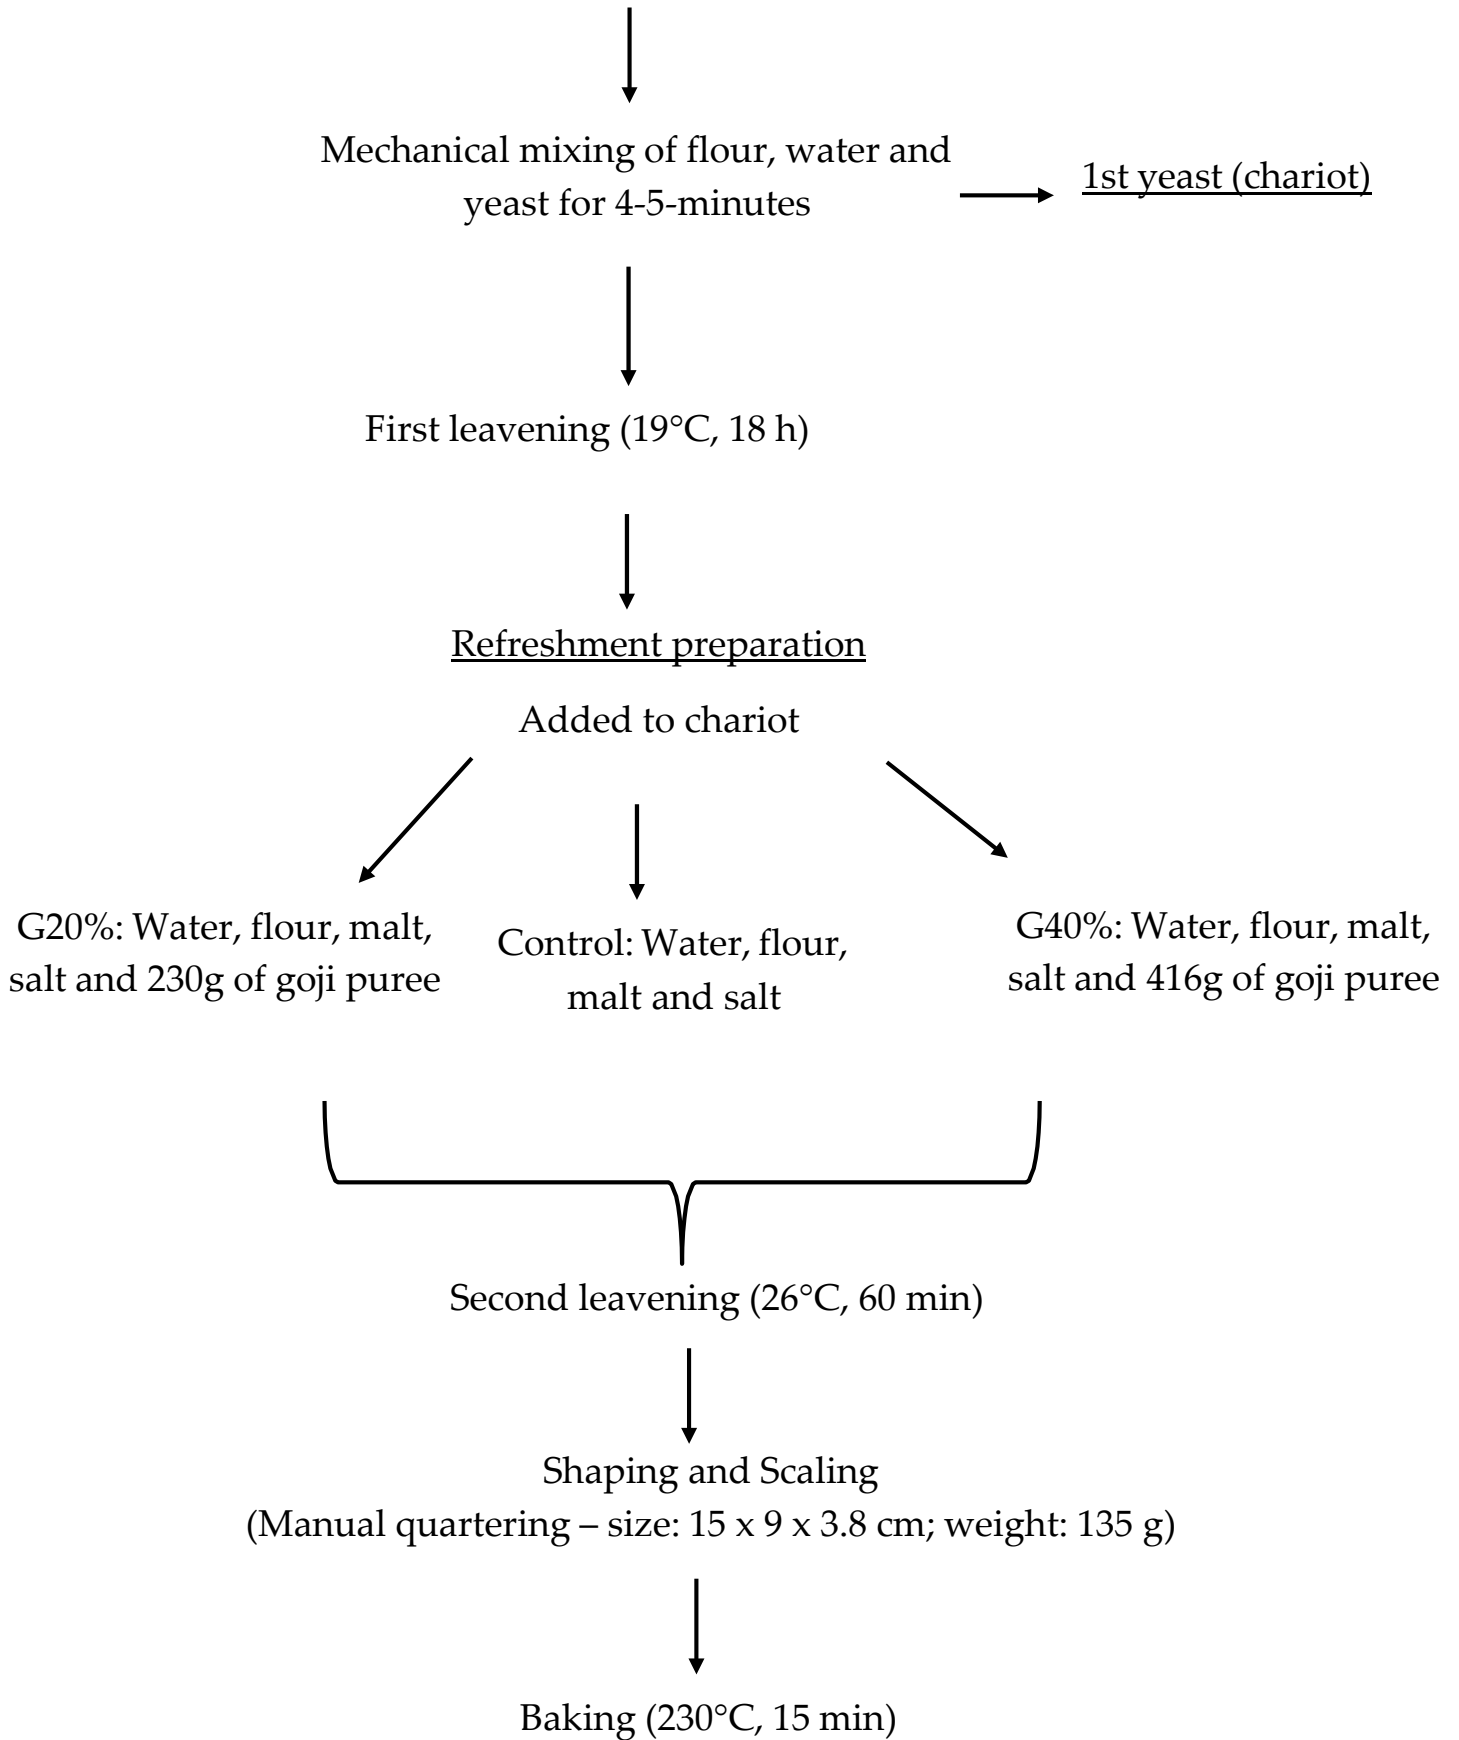

**Figure S1.** Flowchart of “Ciabatta” bread and enriched bread preparation

**Table S1 - Sensory descriptors list**

| <b>Category</b>   | <b>Descriptor</b>  | <b>Definition</b>                          |
|-------------------|--------------------|--------------------------------------------|
| <b>Appearance</b> | General appearance | Presence and intensity of alveoli in crumb |
|                   | Alveoli            |                                            |
|                   | Crust colour       |                                            |
|                   | Crumb colour       |                                            |
|                   | Surface cracking   |                                            |
| <b>Olfactory</b>  | Fragrance          | Product typical flavor intensity           |
|                   | Toasted            |                                            |
|                   | Cereal             |                                            |
|                   | Yeast              |                                            |
|                   | Stale/Rancid       |                                            |
|                   | Pungent            |                                            |
| <b>Taste</b>      | Salty              | Product typical taste intensity            |
|                   | Sweet              |                                            |
|                   | Bitter             |                                            |
|                   | Acid               |                                            |
|                   | Toasted            |                                            |
|                   | Cereal             |                                            |
|                   | Yeast              |                                            |
|                   | Stale/Rancid       |                                            |
| <b>Texture</b>    | Gumminess          |                                            |
|                   | Crunchiness        |                                            |
|                   | Cohesivity         |                                            |
|                   | Hardness           |                                            |
|                   | Springiness        |                                            |
